# Supplementary material
Source: MDPI journal article supplement (https://www.mdpi.com/2073-4344/11/8/969)
Supplement: s1 [file s1 › catalysts-1294377-supplementary.pdf]

## SUPPORTING INFORMATION

# Photoelectrochemical Oxidation in Ambient Conditions Using Earth-abundant Hematite Anode: A Green Route for Synthesis of Biobased Polymer Building Blocks

Anurag Kawde <sup>1,2,\*</sup>, Mahmoud Sayed <sup>3,4,†</sup>, Qi Shi<sup>2</sup>, Jens Uhlig<sup>1,2</sup>,

Tönu Pullerits <sup>2,\*</sup>, Rajni Hatti-Kaul <sup>3,\*</sup>

<sup>1</sup>Lund Institute of advanced Neutron and X-Ray Science, Lund University, Sweden

<sup>2</sup>Chemical Physics and NanoLund, Department of Chemistry, Lund University, Sweden

<sup>3</sup>Division of Biotechnology, Department of Chemistry, Lund University, P.O. Box 124, SE-22100 Lund, Sweden

<sup>4</sup> Department of Botany and Microbiology, Faculty of Science, South Valley University, 83523, Egypt

\* Corresponding authors, E-mail address: [anurag.kawde@linxs.lu.se](mailto:anurag.kawde@linxs.lu.se)

[tonu.pullerits@chemphys.lu.se](mailto:tonu.pullerits@chemphys.lu.se)

[rajni.hatti-kaul@biotek.lu.se](mailto:rajni.hatti-kaul@biotek.lu.se)

<sup>†</sup> Authors contributed equally

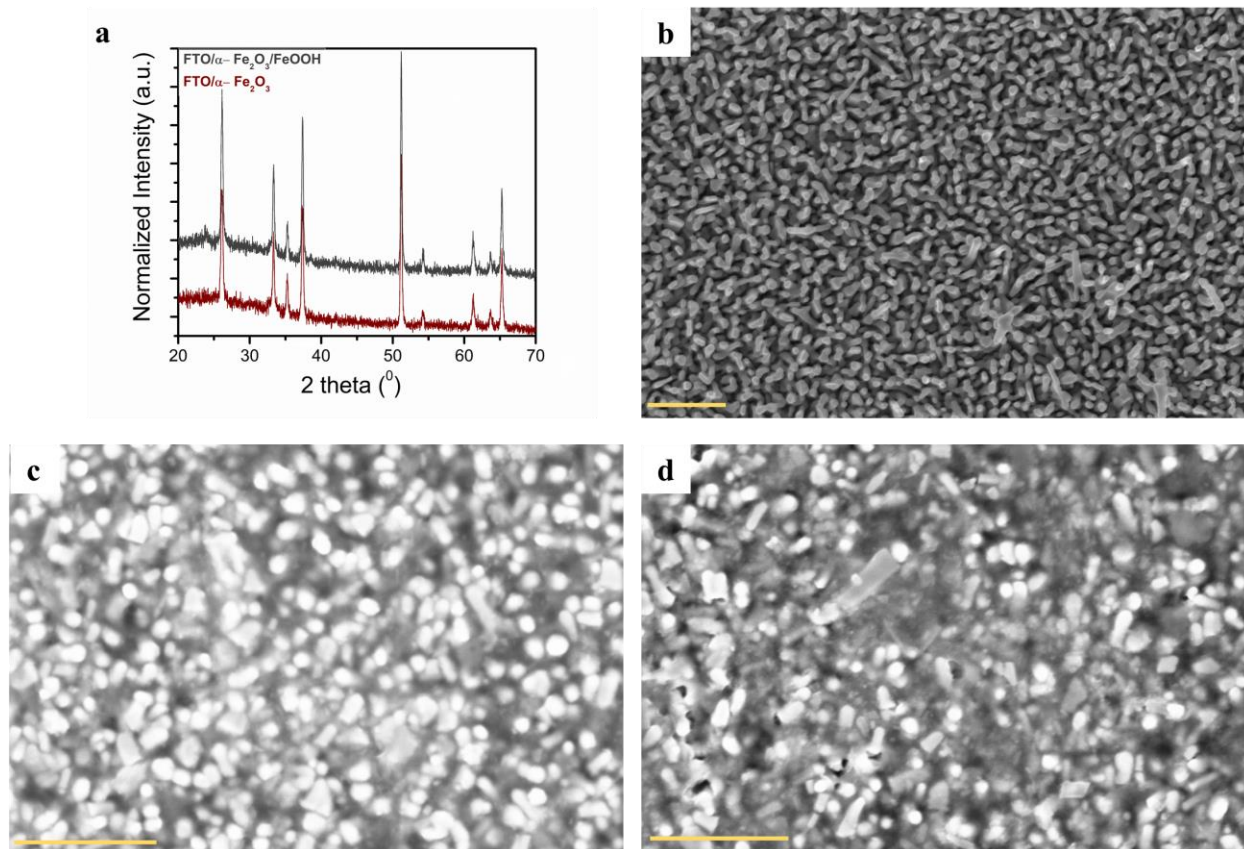

**Figure S1.** **a)** X-ray diffraction patterns for the bare (black trace) and modified hematite (red trace), **b)** and **c)** show the planar top view scanning electron micrographs of bare and modified hematite photoanode, respectively, before the PEC experiment, while **d)** shows a planar top view scanning electron micrograph after the 20 hour PEC run. The bar represents 1  $\mu$ m.

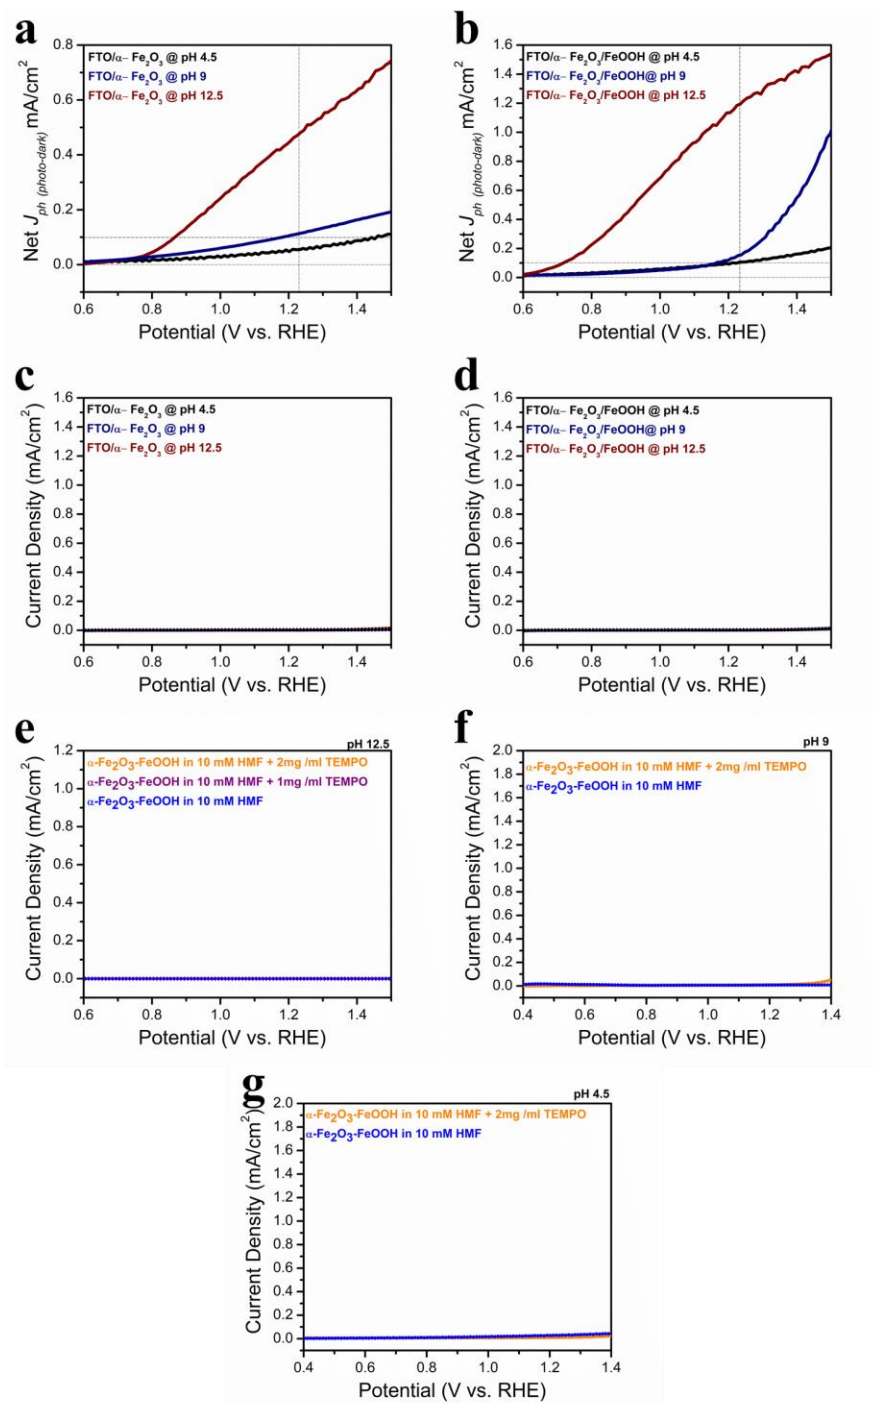

**Figure S2.** LSVs for the a) bare and b) modified hematite photoanodes at different pH values (4.5, 9.0, and 12.5) in 1 M Na<sub>2</sub>SO<sub>4</sub> solution, and the corresponding dark current for c) bare and d) modified photoanodes, respectively. The dark current response for 5-HMF oxidation at e) pH 12.5, f) pH 9.0, and g) pH 4.5, are also shown.

**Table S1.**  $V_{onset}$  potentials obtained for modified hematite under different pH conditions and the net photocurrent density recorded at 1.4  $V_{RHE}$  (in square bracket- orange color).

| Experimental Condition | 1M Na <sub>2</sub> SO <sub>4</sub><br>[ $J_{ph}$ (@1.4 $V_{RHE}$ )<br>mA/cm <sup>2</sup> ] | 1M Na <sub>2</sub> SO <sub>4</sub> + 10 mM 5-HMF<br>[ $J_{ph}$ (@1.4 $V_{RHE}$ )<br>mA/cm <sup>2</sup> ] | 1M Na <sub>2</sub> SO <sub>4</sub> + 10 mM 5-HMF + 1mg/mL TEMPO<br>[ $J_{ph}$ (@1.4 $V_{RHE}$ )<br>mA/cm <sup>2</sup> ] | 1M Na <sub>2</sub> SO <sub>4</sub> + 10 mM 5-HMF + 2mg/mL TEMPO<br>[ $J_{ph}$ (@1.4 $V_{RHE}$ )<br>mA/cm <sup>2</sup> ] |
|------------------------|--------------------------------------------------------------------------------------------|----------------------------------------------------------------------------------------------------------|-------------------------------------------------------------------------------------------------------------------------|-------------------------------------------------------------------------------------------------------------------------|
| $V_{onset}$ (pH 12.5)  | 0.81 [1.4]                                                                                 | 0.78 [1.8]                                                                                               | 0.72 [3.2]                                                                                                              | 0.59 [7.8]                                                                                                              |
| $V_{onset}$ (pH 9.0)   | 1.16 [0.54]                                                                                | 0.75 [1.3]                                                                                               |                                                                                                                         | 0.54 [3.7]                                                                                                              |
| $V_{onset}$ (pH 4.5)   | 1.12 [0.2]                                                                                 | 0.73 [1.02]                                                                                              |                                                                                                                         | 0.40 [2.2]                                                                                                              |

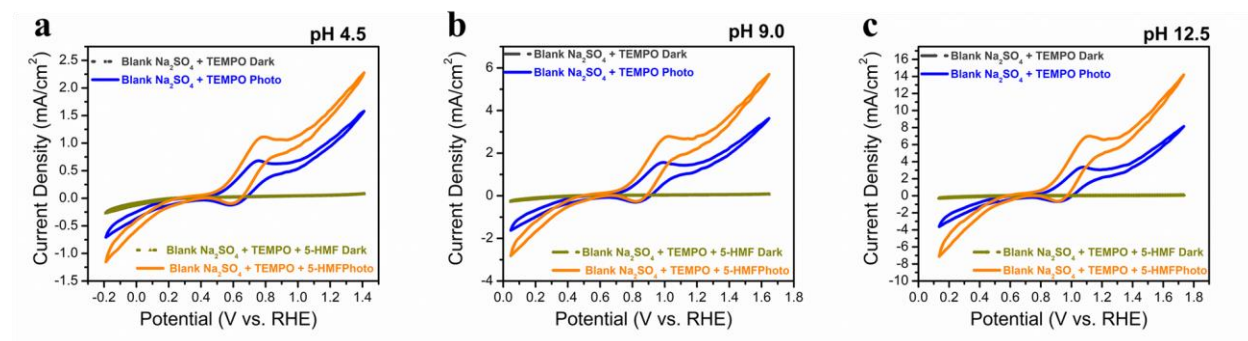

**Figure S3.** Cyclic voltammograms recorded in Na<sub>2</sub>SO<sub>4</sub> + TEMPO with and without 5-HMF in dark and under illumination at a) pH 12.5, b) pH 9.0 and c) pH 4.5.

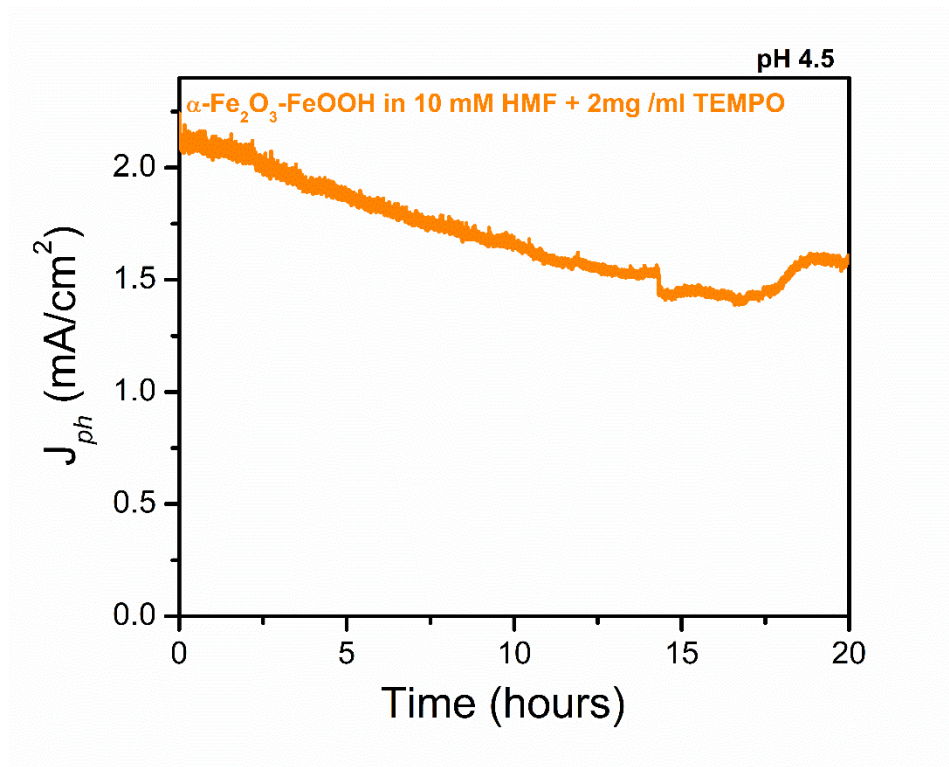

**Figure S4.** Chronoamperometry response for 5-HMF oxidation recorded under visible illumination and 1.1  $V_{RHE}$  at 100  $mW/cm^2$  for  $\alpha\text{-Fe}_2\text{O}_3\text{-FeOOH}$  in 1 M  $\text{Na}_2\text{SO}_4$  solution at pH 4.5

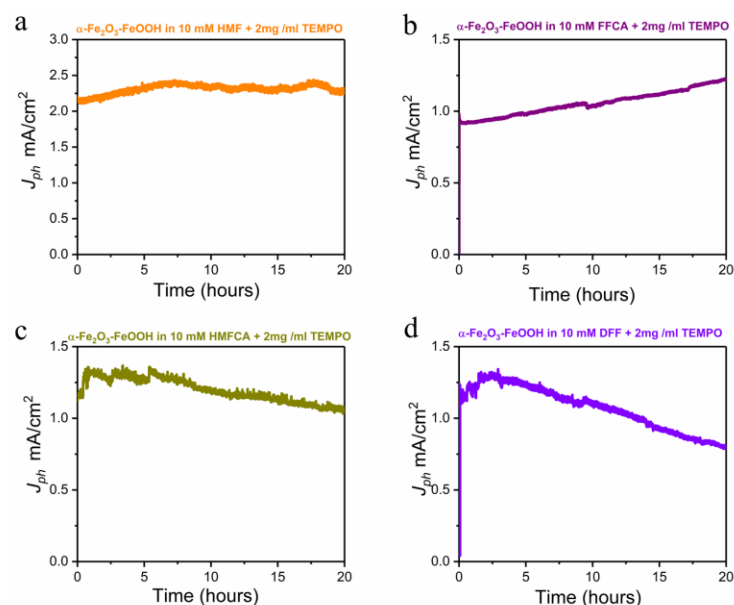

**Figure S5.** Chronoamperometry response for a) 5-HMF, b) FFCA, c) HMFCA, and d) DFF oxidation recorded under visible illumination and 1.1  $V_{RHE}$  at 100  $mW/cm^2$  for  $\alpha\text{-Fe}_2\text{O}_3\text{-FeOOH}$  in 1 M  $\text{Na}_2\text{SO}_4$  solution (pH 9.0).

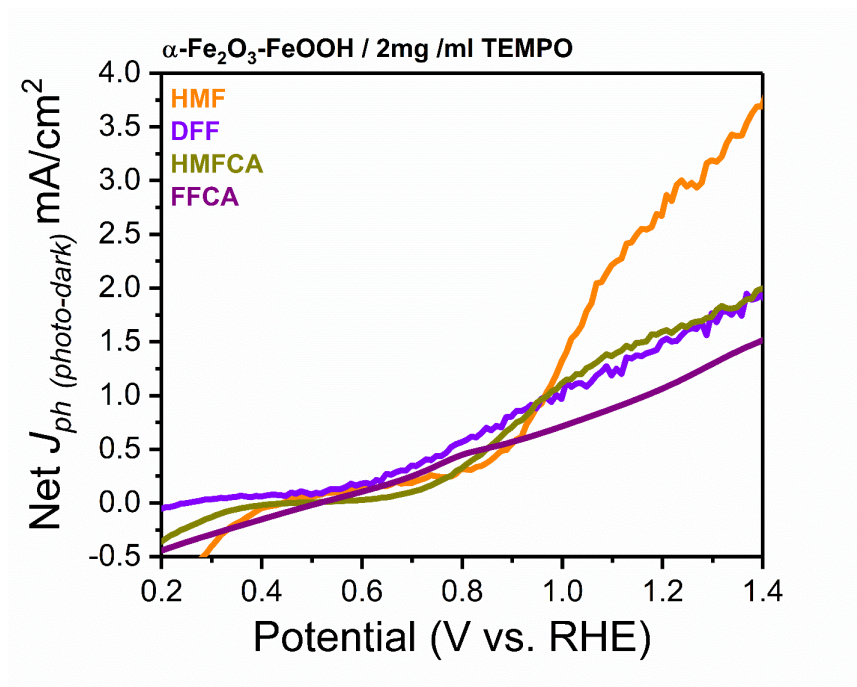

**Figure S6.** LSVs for the modified hematite photoanode recorded for different furan compounds as substrates at pH 9.0 in 1 M Na<sub>2</sub>SO<sub>4</sub> solution.

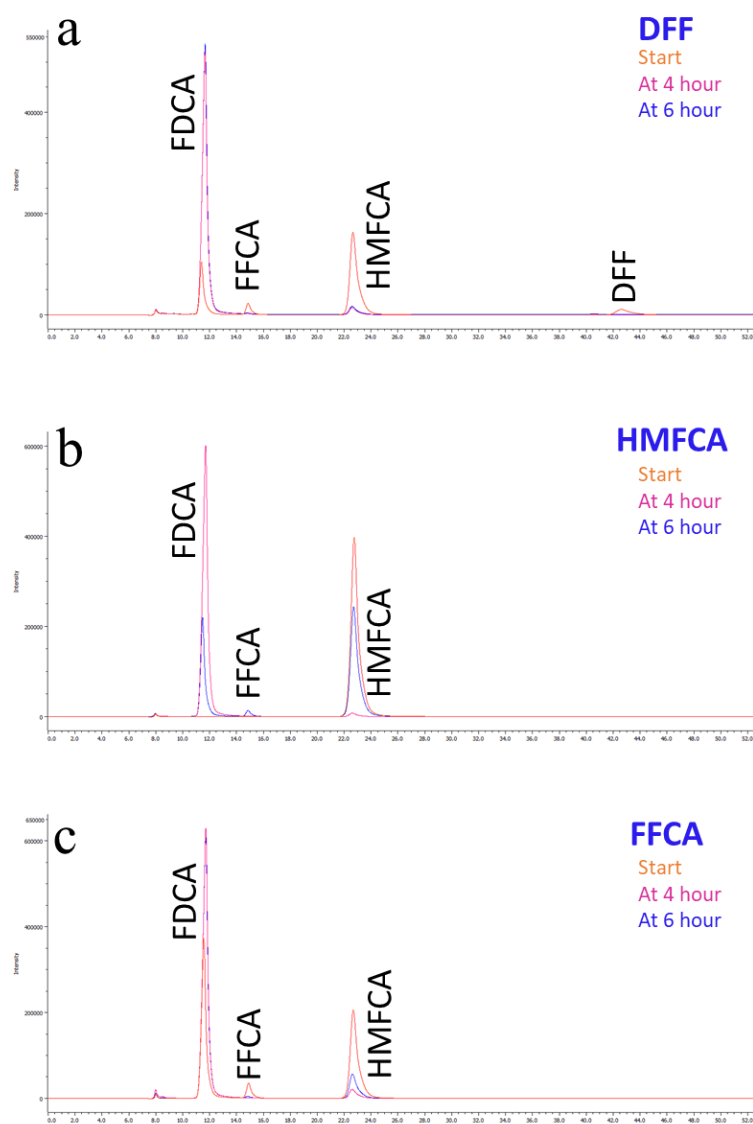

**Figure S7.** HPLC chromatograms of the photooxidation of (a) DFF, (b) HMFCA, and (c) FFCA in 1M Na<sub>2</sub>SO<sub>4</sub> solution at pH 12.5 with 2 mg/mL TEMPO.

**Table S2.** Comparison of the system presented in this study with other photoelectrochemical or photocatalytic systems reported in the literature on 5-HMF oxidation to FDCA.

| Photoelectrode/<br>Photocatalyst     | Initial HMF<br>Concentration<br>(mM) | Illumination<br>Condition                                            | Reaction<br>Condition                                                                                                               | Conversion/<br>Yield % |       | Ref.          |
|--------------------------------------|--------------------------------------|----------------------------------------------------------------------|-------------------------------------------------------------------------------------------------------------------------------------|------------------------|-------|---------------|
|                                      |                                      |                                                                      |                                                                                                                                     | HMF                    | FDCA  |               |
| Hematite<br>photoanode               | 10                                   | Blue LED<br>cold white-<br>Thor Labs<br>(100<br>mW/cm <sup>2</sup> ) | 12.8 mM<br>TEMPO, 1<br>M Na <sub>2</sub> SO <sub>4</sub> ,<br>(pH 12.5),<br>1.1 V <sub>RHE</sub> ,<br>room<br>temperature,<br>5.5 h | 99.2                   | 90.7  | This<br>study |
| BiVO <sub>4</sub> photoanode         | 5                                    | AM 1.5 G<br>(100<br>mW/cm <sup>2</sup> )                             | 7.5 mM<br>TEMPO,<br>0.5 M<br>borate<br>buffer (pH<br>9.2), 1.04<br>V <sub>RHE</sub> , 40 °C                                         | 99.24                  | 98.85 | [1]           |
| CoPz/g-C <sub>3</sub> N <sub>4</sub> | 0.8                                  | Xe Light<br>/UV-Visible<br>(500<br>mW/cm <sup>2</sup> )              | Na <sub>2</sub> B <sub>4</sub> O <sub>7</sub><br>buffer (pH<br>9.18) room<br>temperature,<br>14 h                                   | 99.1                   | 96.1  | [2]           |
| Ni/CdS nanosheet                     | 10                                   | 440-460 nm<br>blue LED<br>(8 W)                                      | 10 mg of<br>Ni/CDS, 10<br>M NaOH, 2<br>h                                                                                            | ~ 100                  | ~ 100 | [3]           |
| ZnO/PPy                              | 8                                    | 450 nm blue<br>LED<br>(102 W/cm <sup>2</sup> )                       | 50 mg of<br>catalysts,<br>aq. media,<br>40 °C, 6 h                                                                                  | 30                     | 5.4   | [4]           |

## References

1. Cha, H.G.; Choi, K.-S. Combined biomass valorization and hydrogen production in a photoelectrochemical cell. *Nat. Chem.* **2015**, *7*, 328.
2. Xu, S.; Zhou, P.; Zhang, Z.; Yang, C.; Zhang, B.; Deng, K.; Bottle, S.; Zhu, H. Selective oxidation of 5-hydroxymethylfurfural to 2, 5-furandicarboxylic acid using O<sub>2</sub> and a photocatalyst of Co-thioporphyrazine bonded to g-C<sub>3</sub>N<sub>4</sub>. *Journal of the American Chemical Society* **2017**, *139*, 14775-14782.
3. Han, G.; Jin, Y.-H.; Burgess, R.A.; Dickenson, N.E.; Cao, X.-M.; Sun, Y. Visible-light-driven valorization of biomass intermediates integrated with H<sub>2</sub> production catalyzed by ultrathin Ni/CdS nanosheets. *Journal of the American Chemical Society* **2017**, *139*, 15584-15587.
4. Gonzalez-Casamachin, D.A.; De la Rosa, J.R.; Lucio-Ortiz, C.J.; Sandoval-Rangel, L.; García, C.D. Partial oxidation of 5-hydroxymethylfurfural to 2, 5-furandicarboxylic acid using O<sub>2</sub> and a photocatalyst of a composite of ZnO/PPy under visible-light: Electrochemical characterization and kinetic analysis. *Chemical Engineering Journal* **2020**, *393*, 124699.
